# Supplementary material
Source: PubMed Central journal article supplement (PMC3338350)
Supplement: mmc1.pdf [file mmc1.pdf]

## Tfam +/- genotyping PCR results

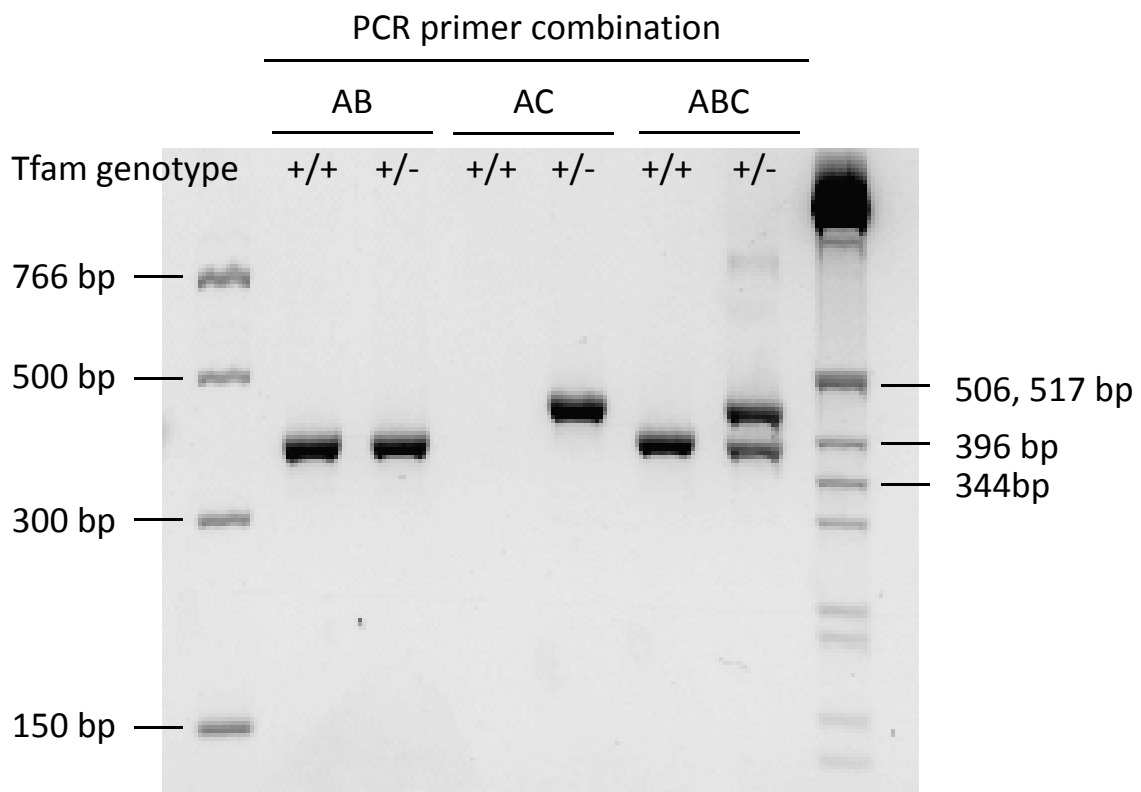

Tfam wild-type allele PCR product band: AB (396 bp)

Tfam deleted allele PCR product band: AC (438 bp)
