# Supplementary material
Source: PubMed Central journal article supplement (PMC3338350)
Supplement: mmc3.pdf [file mmc3.pdf]

## A. Hematoxylin and eosin staining

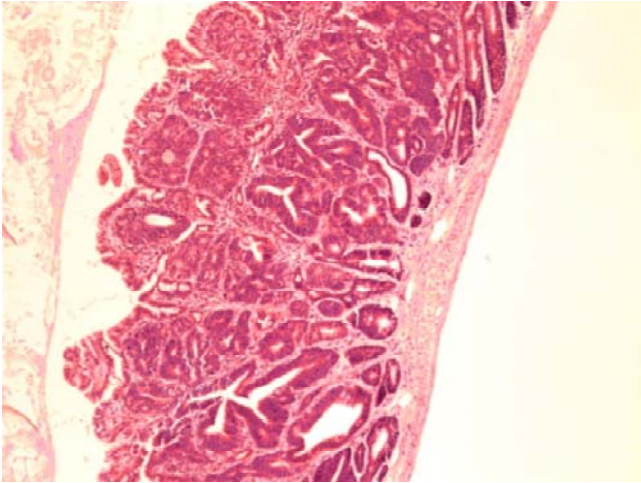

$APC^{Min/+}$

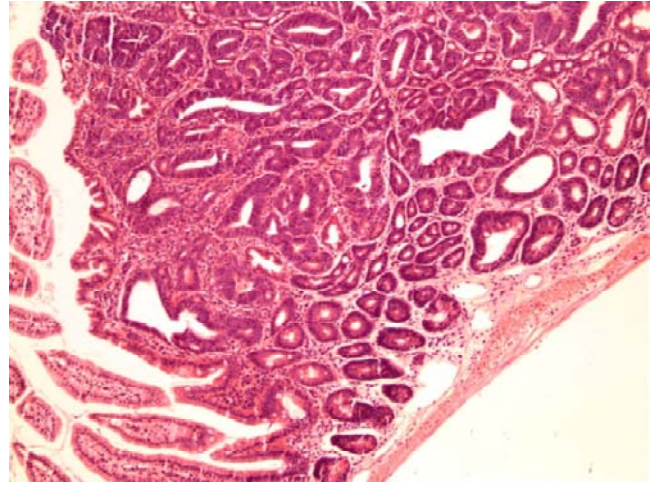

$APC^{Min/+}$   $Tfam^{+/-}$

## B. $\beta$ -catenin immunostaining

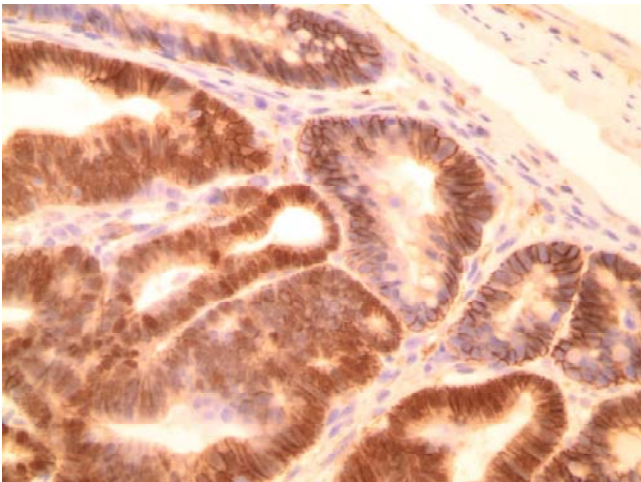

$APC^{Min/+}$

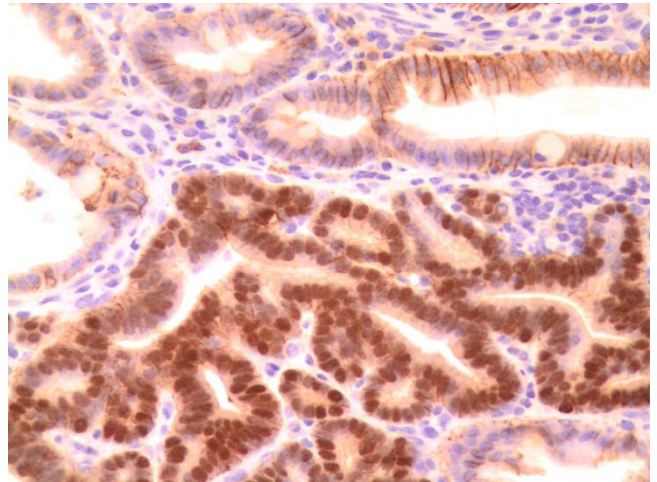

$APC^{Min/+}$   $Tfam^{+/-}$
