# Supplementary material
Source: PubMed Central journal article supplement (PMC3338350)

A

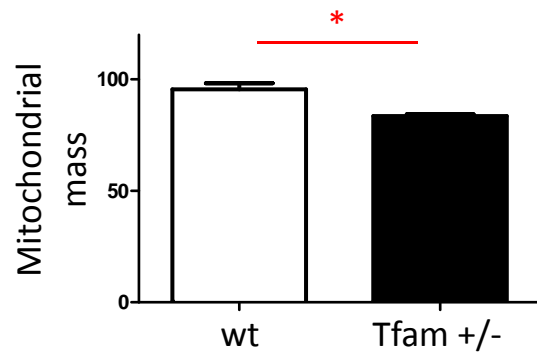

B

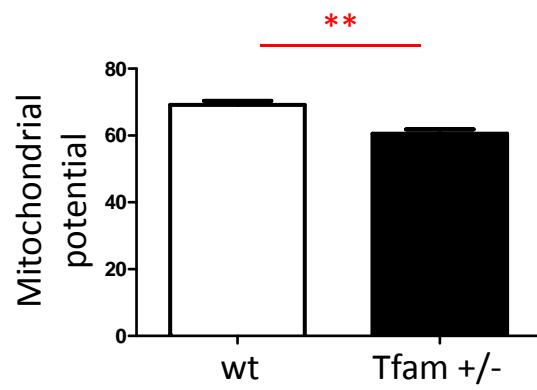

Supplement: mmc2.pdf [file mmc2.pdf]

A

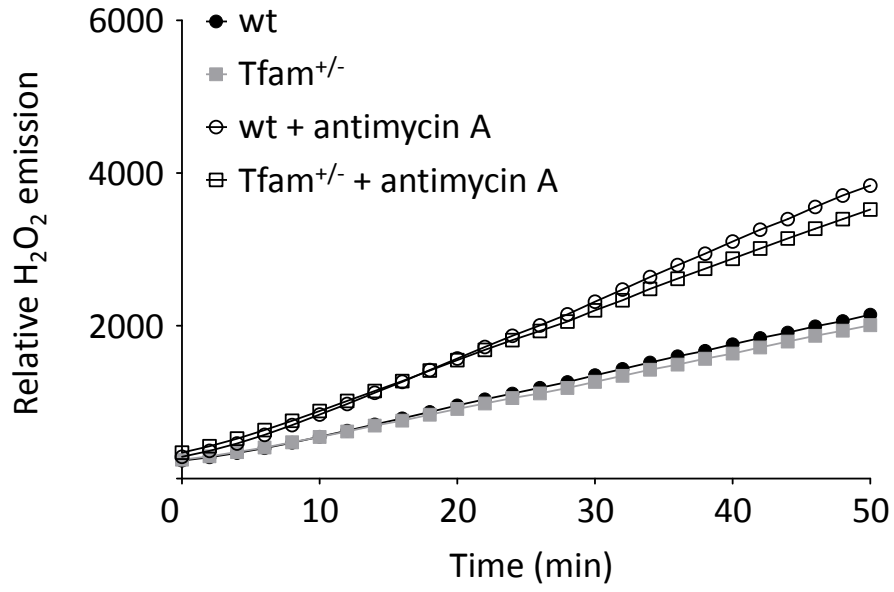

B

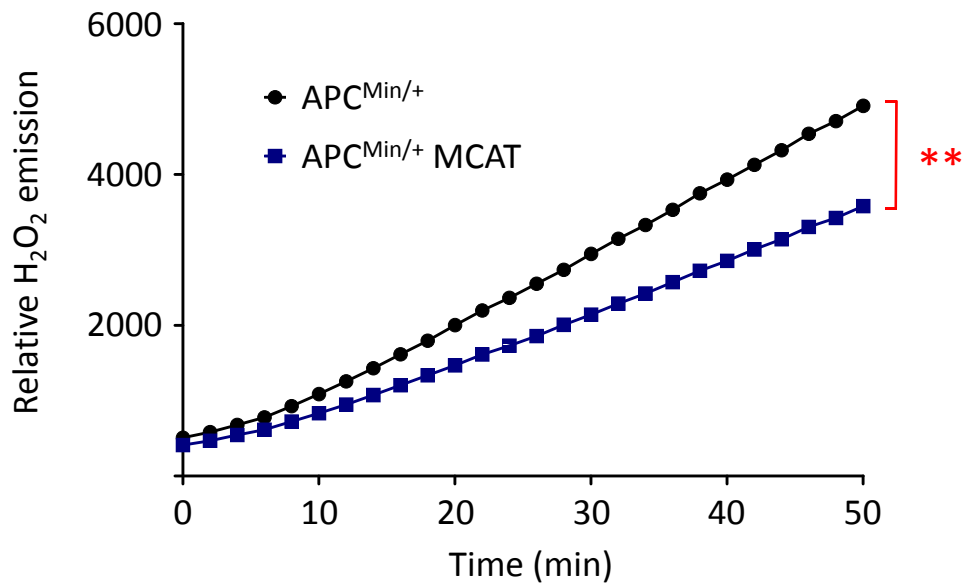

C

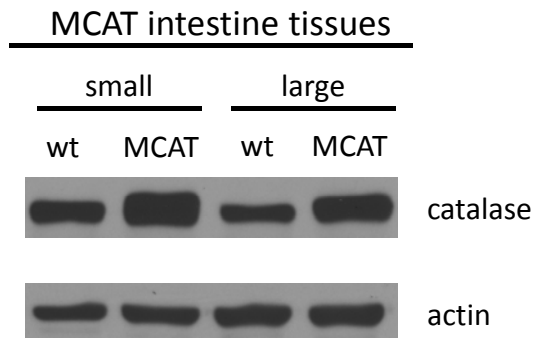

Supplemental Figure 4.

Supplement: mmc4.pdf [file mmc4.pdf]
